# Supplementary material
Source: PubMed Central journal article supplement (PMC7047097)
Supplement: Supp_Data.pdf [file Supp_Data.pdf]

## Supplementary Data

### Supplementary Materials and Methods

#### Preparation of expression plasmids of TR $\alpha$ 1-ligand-binding domain with mutation

pCS2<sup>+</sup>-TR $\alpha$ 1L plasmid was a generous gift of Dr. Luca Persani (Insituto Auxologico Italiano, Italy). The pcDNA3.1-TR $\alpha$ 1L plasmid was generated using the pCS2<sup>+</sup>-TR $\alpha$ 1L plasmid as template. The pcDNA3.1-TR $\alpha$ B plasmid (XM\_009306720) was purchased by NOVOPRO (Cat. No. NPT 146076). The pcDNA3.1-ThraaPhe404Leufs\*22 and pcDNA3.1-ThraaLeu405Glufs\*6 mutant plasmids were generated by PCR mutagenesis using pcDNA3.1-TR $\alpha$ 1L plasmid as a template. The pcDNA3.1-ThrabGlu394\* and pcDNA3.1-ThrabThr393Profs\*31 mutant plasmids were generated by PCR mutagenesis method. The pcDNA3.1-TR $\alpha$ B wild-type plasmid was used as a template. All PCR reactions to generate plasmids were performed using Takara LA Taq (Cat. No. HRR002A) per the manufacturer's instructions, and the products were validated by DNA sequencing using sequencing primers (T7, BGH). Primers were as follows:

For pcDNA3.1-TR $\alpha$ 1L plasmid:

Forward-5'-CGCATAAGCTTCCACCATGGAAAACAC  
AGAGCAGGAGCA

Reverse-5'-GCCCTCGAGGCCGCTCACCTTAAGCAG  
GAACCGTCTTCT

For pcDNA3.1-ThraaPhe404Leufs\*22 mutant plasmid:

Forward-5'-CGCATAAGCTTCCACCATGGAAAACAC  
AGAGCAGGAGCA

Reverse-5'-GGCCCTCGAGGCCGCTCACCTTAAGCA  
GGAACCGTCTTCTGTGCTGCCACTCCAGTGCT  
TCCCTCCTGATCCTCGAAGACCTCAAGAGCGG  
CGGGAACAGTT

For pcDNA3.1-ThraaLeu405Glufs\*6 mutant plasmid:

Forward-5'-CGCATAAGCTTCCACCATGGAAAACAC  
AGAGCAGGAGCA

Reverse-5'-GGCCCTCGAGGCCGCTCACCTTAAGCA  
GGAACCGTCTTCTGTGCTGCCACTCCAGTGCT  
TCCCTCCTGACCTGGGTCACACCTCCTGATCC  
TCGAAGAGCGGCGGGAACAGTTCTGTTGGACA  
CTC

For pcDNA3.1-ThrabThr393Profs\*31 mutant plasmid:

Forward-5'-AAACTTAAGCTTGGCGCACCATGGAAC  
ACATGCCCAAGGAGCAGGA

Reverse-5'-TCGGTACCTCACACGTCCTGATCCTCGA  
AGACCTCCAGGAAAAGTGGGGGAAAGAAGGTG  
GGCATTCCACCTTCATGTGCAGGAAGCGACTGG  
CGTGGCAG

For pcDNA3.1-Thrab Glu394\* mutant plasmid:

Forward-5'-AAACTTAAGCTTGGCGCACCATGGAAC  
ACATGCCCAAGGAGCAGGA

Reverse-5'-TCGGTACCTCACACGTCCTGATCCTCG  
AAGACCTCCAGGAAAAGTGGGGGAAAGAGTTC  
AAGTGGGGCATTCCACCTTCATGTGCAGGAAGC  
GACTGGCGTGGCAG

For Sequencing of plasmids

For T7: TAATACGACTCACTATAGGG

For BGH: TAGAAGGCACAGTCGAGG

#### T3-binding assay

Zebrafish TR $\alpha$ 1L, ThraaPhe404Leufs\*22, ThraaLeu405-Glufs\*6, TR $\alpha$ B, ThrabGlu394\*, and ThrabThr393Profs\*31 proteins were prepared by *in vitro* transcription/translation (TNT-quick-couple transcription/translation system; Cat. No. L1170; Promega). *In vitro* translated proteins were analyzed by sodium dodecyl sulfate-polyacrylamide gel electrophoresis, followed by Western blotting using anti-TR $\alpha$ 1 antibody to ensure that equal amounts of proteins were used in the binding assays. *In vitro* T3-binding assay was performed as described (S1).

#### Reporter assays

Reporter assays were carried out as described (S2). In brief, 0.2  $\mu$ g per well Pal-luciferase reporter plasmids (S3) were transfected with Lipofectamine 2000 (Invitrogen, CA) in CV1 cell with or without T3 treatment according to manufacturer's instructions. Luciferase activity was measured using Victor 3 (PerkinElmer Life and Analytic Sciences, Waltham, MA). Luciferase values were standardized to the ratios of  $\beta$ -galactosidase activity and protein concentrations. The fold of changes in activity was based on the values of negative controls (i.e., no plasmid transfected cell in the absence of T3) as relative activity of 1.

#### Whole mount *in situ* hybridization

The *gh1* plasmid was a gift from Dr. Alberto Rissone (NIH/NHGRI), *keratin-17* plasmid was a gift from Dr. Wolfgang Driever (Albert-Ludwigs-Universitat Freiburg), and both *keratin-4* and *keratin-18* plasmids were gifts from Dr. Benzamin Feldman (NIH/NICHD). Digoxigene (DIG)-labeled RNA probes for *gh1*, *keratin-4*, *keratin-17*, and *keratin-18* were prepared from linearized template DNAs using T7 or SP6 with RNA polymerase and RNA Labeling Kit (Roche). Whole mount *in situ* hybridization was performed as described (S4). Embryos and larva were treated with 30% hydrogen peroxide to remove pigment. DIG-probes were detected using anti-DIG-alkaline phosphatase and NBT/BCIP (Sigma Aldrich). Embryos and larvae were imaged at from 1 to 5 days postfertilization using Leica TL 5000 with LAS X Imaging Software Suite. In all cases, embryos were genotyped after imaging for identification.

#### Statistical analysis

All data are expressed as mean  $\pm$  standard deviation. All tests were two-tail unpaired *t*-test and *p* < 0.05 was considered significant. GraphPad Prism version 7.7 for Mac OS X was used to perform analyses of variances.

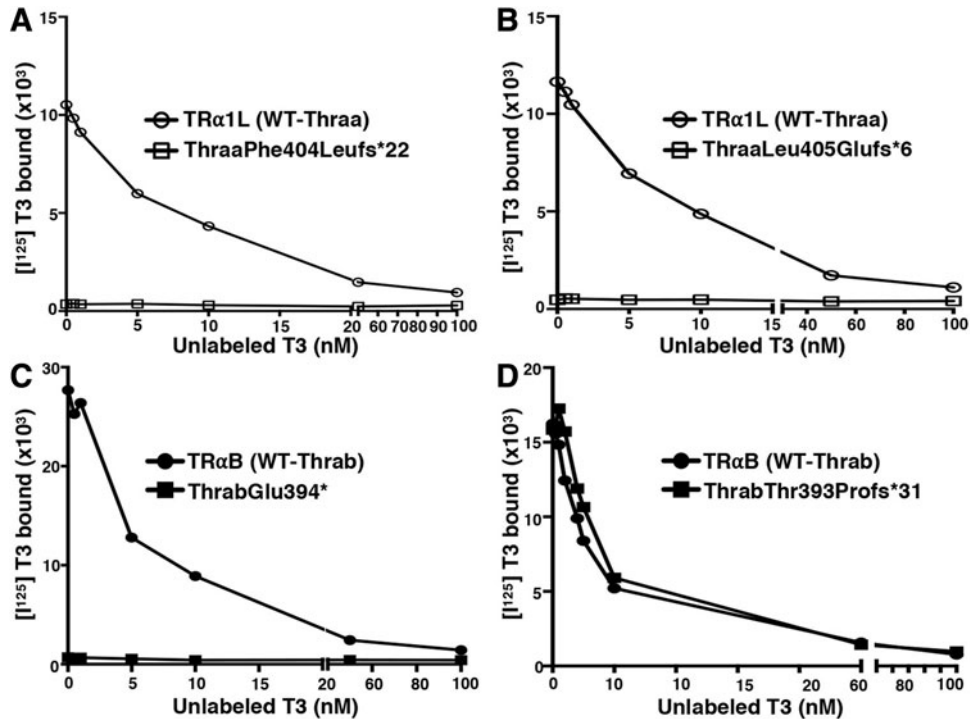

**SUPPLEMENTARY FIG. S1.** Three C-terminal truncation mutants of TR $\alpha$  lose T3-binding activity. (A) An equal amount of WT-TR $\alpha$ 1L, 4-bp deletion ThraaPhe404Leufs\*22, (B) 8-bp insertion ThraaLeu405Glufs\*6, (C) WT-TR $\alpha$ B, 1bp-insertion ThrabGlu394\*, and (D) 4-bp deletion ThrabThr393Profs\*31 were used in the competitive T3-binding assay as described in Supplementary Materials and Methods. WT-TR $\alpha$ 1L and WT-TR $\alpha$ B bound to T3 with a dissociation constant (Kd) of 3.5 and 3.2 nM, respectively. The three C-terminal truncation mutants of TR $\alpha$  (4-bp deletion ThraaPhe404Leufs\*22 (A), 8-bp insertion ThraaLeu405Glufs\*6 (B), and 1 bp-insertion ThrabGlu394\* mutant (C) did not bind T3. However, the 4-bp deletion ThrabThr393Profs\*31 (D) mutant bound to T3 with Kd of 3.7 nM, similar to that of WT-TR $\alpha$ B. Data shown are representative of three independent experiments ( $n=3$ ). bp, base pair; WT, wild-type.

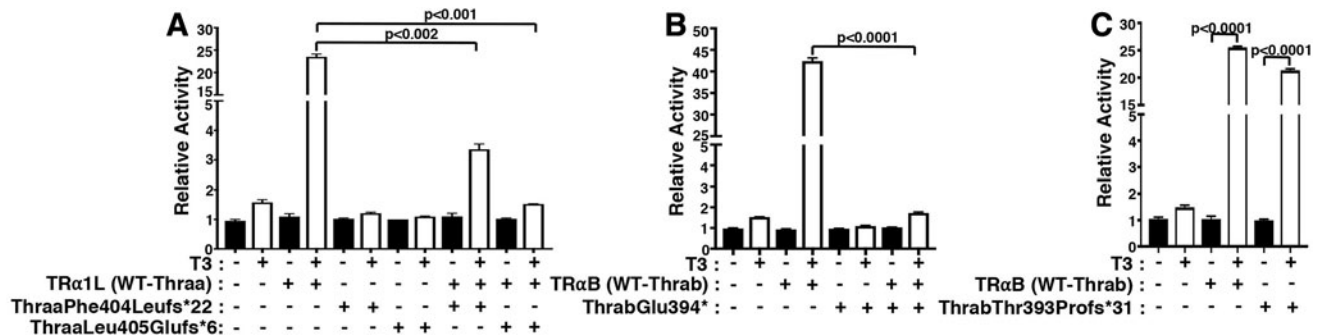

**SUPPLEMENTARY FIG. S2.** Three C-terminal truncation mutants of TR $\alpha$  exhibit dominant negative activity. The reporter plasmid (pPPRE-TK-Luc) and the expression plasmids for (A) WT-TR $\alpha$ 1-ThraaPhe404Leufs\*22 and ThraaLeu405Glufs\*6, (B) WT-TR $\alpha$ B and ThrabGlu394\*, and (C) ThrabThr393Profs\*31 were co-transfected into monkey CV-1 cells in absence or presence of T3 (100 nM), as indicated. The transfection of WT receptor plasmids led to T3-dependent activation of luciferase reporter; however, co-transfection of WT and C-terminal truncation mutant receptor plasmids suppressed T3-dependent luciferase reporter activity of the WT receptor (A, B), but not the 4-bp deletion ThrabThr393Profs\*31 (C). Data were normalized against the protein concentration in the lysates. Relative luciferase activity was calculated and shown as fold-induction relative to the luciferase activity of the reporter plasmid (pPPRE-TK-Luc) in the cells in the absence of T3, defined as 1. Data shown are representative of three independent experiments as mean  $\pm$  standard deviation ( $n=3$ ). The  $p$ -values are indicated.

## A Amino acid sequence alignment of the ligand binding domain in human and zebrafish Thraa receptors

|                                                                                                                                                    |                                                                                                                                                                                                                                                                                                                                                                                                                                                         |
|----------------------------------------------------------------------------------------------------------------------------------------------------|---------------------------------------------------------------------------------------------------------------------------------------------------------------------------------------------------------------------------------------------------------------------------------------------------------------------------------------------------------------------------------------------------------------------------------------------------------|
| (Human) Wild-Type TR $\alpha$ 1<br>(Patient) TR $\alpha$ 1F397fs406X<br>Zebrafish TR $\alpha$ IL<br>Zebrafish TR $\alpha$ IS<br>ThraaLeu405Glufs*6 | PEEWDLIHIATEAHRSTNAQGS HWKQRRKFLPDDIGQSP IVSMPDGDKVDLEAFSEFTKI<br>PEEWDLIHIATEAHRSTNAQGS HWKQRRKFLPDDIGQSP IVSMPDGDKVDLEAFSEFTKI<br>VSEWELIRMVTEAHRHTNAQGS HWKQRRKFLPEDIGQSPAP-TSDNDKVDLEAFSEFTKI<br>VSEWELIRMVTEAHRHTNAQGS HWKQRRKFLPEDIGQSPAP-TSDNDKVDLEAFSEFTKI<br>VSEWELIRMVTEAHRHTNAQGS HWKQRRKFLPEDIGQSPAP-TSDNDKVDLEAFSEFTKI<br>VSEWELIRMVTEAHRHTNAQGS HWKQRRKFLPEDIGQSPAP-TSDNDKVDLEAFSEFTKI<br>..**:::..***** ***** *****:*****:***** * .***** |
| (Human) Wild-Type TR $\alpha$ 1<br>(Patient) TR $\alpha$ 1F397fs406X<br>Zebrafish TR $\alpha$ IL<br>Zebrafish TR $\alpha$ IS<br>ThraaLeu405Glufs*6 | ITPAITRVVDFAKKLP MFSELPCEDQI ILLKGCCMEIMSLRAAVRYDPESDTLTLTSGEMA<br>ITPAITRVVDFAKKLP MFSELPCEDQI ILLKGCCMEIMSLRAAVRYDPESDTLTLTSGEMA<br>ITPAITRVVDFAKKLP MFSELPCEDQI ILLKGCCMEIMSLRAAVRYDPESDTLTLTSGEMA<br>ITPAITRVVDFAKKLP MFSELPCEDQI ILLKGCCMEIMSLRAAVRYDPESDTLTLTSGEMA<br>ITPAITRVVDFAKKLP MFSELPCEDQI ILLKGCCMEIMSLRAAVRYDPESDTLTLTSGEMA<br>ITPAITRVVDFAKKLP MFSELPCEDQI ILLKGCCMEIMSLRAAVRYDPESDTLTLTSGEMA<br>*****:*****                           |
| (Human) Wild-Type TR $\alpha$ 1<br>(Patient) TR $\alpha$ 1F397fs406X<br>Zebrafish TR $\alpha$ IL<br>Zebrafish TR $\alpha$ IS<br>ThraaLeu405Glufs*6 | VKREQLKNGGLGVVSDAIFDLGKSLSAFNLDDETEVALLQAVLLMSTDRSGLLCVVKIEKS<br>VKREQLKNGGLGVVSDAIFDLGKSLSAFNLDDETEVALLQAVLLMSTDRSGLLCVVKIEKS<br>VSREQLKNGGLGVVSDAIFDLGKSLSAFNLDDETEVALLQAVLLMSSDRSGLTCVEKIEK<br>VSREQLKNGGLGVVSDAIFDLGKSLSAFNLDDETEVALLQAVLLMSSDRSGLTCVEKIEK<br>VSREQLKNGGLGVVSDAIFDLGKSLSAFNLDDETEVALLQAVLLMSSDRSGLTCVEKIEK<br>VSREQLKNGGLGVVSDAIFDLGKSLSAFNLDDETEVALLQAVLLMSSDRSGLTCVEKIEK<br>* .*****:***** *****:*****:***** ** :**** .           |
| (Human) Wild-Type TR $\alpha$ 1<br>(Patient) TR $\alpha$ 1F397fs406X<br>Zebrafish TR $\alpha$ IL<br>Zebrafish TR $\alpha$ IS<br>ThraaLeu405Glufs*6 | QEAYLLAFEHYVNRKHNIPHFWP KLLMKVTDLRMIGACHASRFLHMKVECPTELFPPPLF<br>QEAYLLAFEHYVNRKHNIPHFWP KLLMKVTDLRMIGACHASRFLHMKVECPTELFPPPLF<br>QEMYL LAFEHYINRKHNI SHFWPKLLMKVTNLRMIGACHASRFLHMKVECPTELFPPPLF<br>QEMYL LAFEHYINRKHNI SHFWPKLLMKVTNLRMIGACHASRFLHMKVECPTELFPPPLF<br>QEMYL LAFEHYINRKHNI SHFWPKLLMKVTNLRMIGACHASRFLHMKVECPTELFPPPLF<br>QEMYL LAFEHYINRKHNI SHFWPKLLMKVTNLRMIGACHASRFLHMKVECPTELFPPPLF<br>** *****:***** *****:*****:*****:***** :      |
| (Human) Wild-Type TR $\alpha$ 1<br>(Patient) TR $\alpha$ 1F397fs406X<br>Zebrafish TR $\alpha$ IL<br>Zebrafish TR $\alpha$ IS<br>ThraaLeu405Glufs*6 | LEVFEDQEV-----<br>PRGL*-----<br>LEVFEDQEGSTGVAAQEDGSCLR<br>LEVFEDQEV-----<br>EDQEV*-----                                                                                                                                                                                                                                                                                                                                                                |

## B Amino acid sequence alignment of the ligand binding domain in human and zebrafish Thrab receptors

|                                                                                                                                              |                                                                                                                                                                                                                                                                                                                                                                                                                                                                                                                     |
|----------------------------------------------------------------------------------------------------------------------------------------------|---------------------------------------------------------------------------------------------------------------------------------------------------------------------------------------------------------------------------------------------------------------------------------------------------------------------------------------------------------------------------------------------------------------------------------------------------------------------------------------------------------------------|
| (Human) Wild-Type TR $\alpha$ 1<br>(Patient) TR $\alpha$ 1 E403X<br>(Patient) TR $\alpha$ 1 C392X<br>Zebrafish TR $\alpha$ B<br>ThrabGlu394* | PEEWDLIHIATEAHRSTNAQGS HWKQRRKFLPDDIGQSP IVSMPDGDKVDLEAFSEFTKI<br>PEEWDLIHIATEAHRSTNAQGS HWKQRRKFLPDDIGQSP IVSMPDGDKVDLEAFSEFTKI<br>PSEWELIRMVTEAHRHTNAQGS HWKQRRKFLPEDIGQSPAP-TSDNDKVDLEAFSEFTKI<br>-SEWELIRVVTEAHRHTNAQGS HWKQRRKFLPEDIGQSPVAPTS DGDKVDLEAFSEFTKI<br>-SEWELIRVVTEAHRHTNAQGS HWKQRRKFLPEDIGQSPVAPTS DGDKVDLEAFSEFTKI<br>..**:::..***** *****:*****:*****:***** . *****                                                                                                                             |
| (Human) Wild-Type TR $\alpha$ 1<br>(Patient) TR $\alpha$ 1 E403X<br>(Patient) TR $\alpha$ 1 C392X<br>Zebrafish TR $\alpha$ B<br>ThrabGlu394* | ITPAITRVVDFAKKLP MFSELPCEDQI ILLKGCCMEIMSLRAAVRYDPESDTLTLTSGEMA<br>ITPAITRVVDFAKKLP MFSELPCEDQI ILLKGCCMEIMSLRAAVRYDPESDTLTLTSGEMA<br>ITPAITRVVDFAKKLP MFSELPCEDQI ILLKGCCMEIMSLRAAVRYDPESDTLTLTSGEMA<br>ITPAITRVVDFAKKLP MFSELPCEDQI ILLKGCCMEIMSLRAAVRYDPESDTLTLTSGEMA<br>ITPAITRVVDFAKKLP MFSELPCEDQI ILLKGCCMEIMSLRAAVRYDPESDTLTLTSGEMA<br>ITPAITRVVDFAKKLP MFSELPCEDQI ILLKGCCMEIMSLRAAVRYDPESDTLTLTSGEMA<br>*****:*****                                                                                       |
| (Human) Wild-Type TR $\alpha$ 1<br>(Patient) TR $\alpha$ 1 E403X<br>(Patient) TR $\alpha$ 1 C392X<br>Zebrafish TR $\alpha$ B<br>ThrabGlu394* | VKREQLKNGGLGVVSDAIFDLGKSLSAFNLDDETEVALLQAVLLMSTDRSGLLCVVKIEKS<br>VKREQLKNGGLGVVSDAIFDLGKSLSAFNLDDETEVALLQAVLLMSTDRSGLLCVVKIEKS<br>VKREQLKNGGLGVVSDAIFDLGKSLSAFNLDDETEVALLQAVLLMSTDRSGLLCVVKIEKS<br>VKREQLKNGGLGVVSDAIFDLGKSLSAFNLDDETEVALLQAVLLMSSDRSGLTCVEKIEK<br>VKREQLKNGGLGVVSDAIFDLGKSLSAFNLDDETEVALLQAVLLMSSDRSGLTCVEKIEK<br>VKREQLKNGGLGVVSDAIFDLGKSLSAFNLDDETEVALLQAVLLMSSDRSGLTCVEKIEK<br>*****:*****:***** *****:*****:***** ** :**** .                                                                   |
| (Human) Wild-Type TR $\alpha$ 1<br>(Patient) TR $\alpha$ 1 E403X<br>(Patient) TR $\alpha$ 1 C392X<br>Zebrafish TR $\alpha$ B<br>ThrabGlu394* | QEAYLLAFEHYVNRKHNIPHFWP KLLMKVTDLRMIGACHASRFLHMKVECPTELFPPPLF<br>QEAYLLAFEHYVNRKHNIPHFWP KLLMKVTDLRMIGACHASRFLHMKVECPTELFPPPLF<br>QEAYLLAFEHYVNRKHNIPHFWP KLLMKVTDLRMIGACHASRFLHMKVECPTELFPPPLF<br>QEMYL LAFEHYINRKHNI SHFWPKLLMKVTNLRMIGACHASRFLHMKVECPTELFPPPLF<br>QEMYL LAFEHYINRKHNI SHFWPKLLMKVTNLRMIGACHASRFLHMKVECPTELFPPPLF<br>QEMYL LAFEHYINRKHNI SHFWPKLLMKVTNLRMIGACHASRFLHMKVECPTELFPPPLF<br>QEMYL LAFEHYINRKHNI SHFWPKLLMKVTNLRMIGACHASRFLHMKVECPTELFPPPLF<br>** *****:***** *****:*****:*****:***** : |
| (Human) Wild-Type TR $\alpha$ 1<br>(Patient) TR $\alpha$ 1 E403X<br>(Patient) TR $\alpha$ 1 C392X<br>Zebrafish TR $\alpha$ B<br>ThrabGlu394* | LEVFEDQEV<br>L-----<br>-----<br>LEVFEDQEV<br>-----                                                                                                                                                                                                                                                                                                                                                                                                                                                                  |

SUPPLEMENTARY FIG. S3. Amino acid sequence alignment of the ligand-binding domain in human and zebrafish Thraa receptors (A) and Thrab receptors (B).

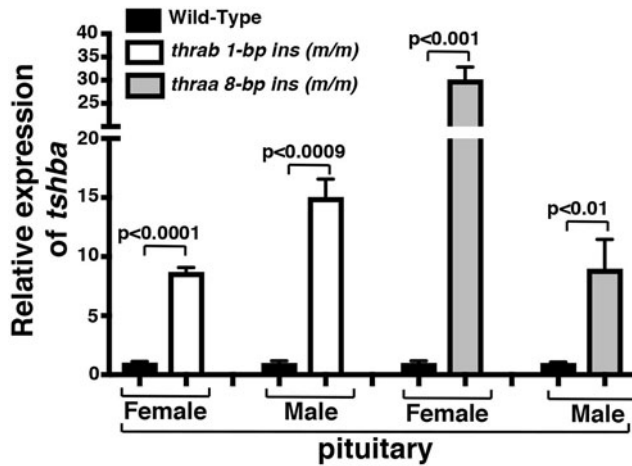

**SUPPLEMENTARY FIG. S4.** The expression of *tshba* gene is upregulated in the pituitaries of *thraa 8-bp insertion (m/m)* and *thrab 1-bp insertion (m/m)* mutant fish. The mRNA expression levels of *tshba* gene of *thraa 8-bp insertion (m/m)* mutant and *thrab 1-bp insertion (m/m)* mutant in the pituitaries of females and males at adult ( $N=10-25$  per sample). The mRNA expression levels of *tshba* (*thyroid stimulating hormone subunit beta a*) gene were measured by RT-qPCR. All expression levels are normalized to that of *efla* (*elongation factor 1-alpha*) in each well and expressed as the fold changes for each sample relative to WT. This experiment was repeated in triplicate. The data are expressed as mean  $\pm$  SE ( $p < 0.05$ ). mRNA, messenger RNA; RT-qPCR, real-time quantitative PCR; SE, standard error.

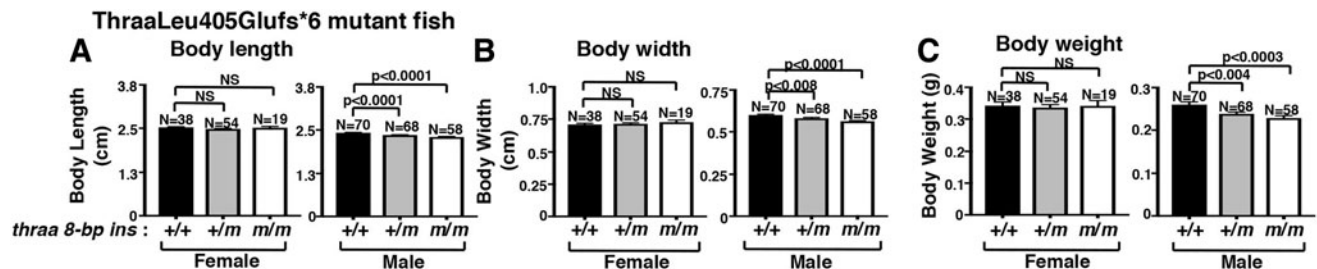

**SUPPLEMENTARY FIG. S5.** Mild impaired growth in adult ThraaLeu405Glufs\*6 mutant fish. (A) Body length, (B) body width, and (C) body weight were measured in both females and males WT, heterozygous and homozygous mutant fish. The number of fish ( $N$ ) measured are indicated. The data are shown as mean  $\pm$  SE with  $p$ -values to indicate significant changes. NS, not significant.



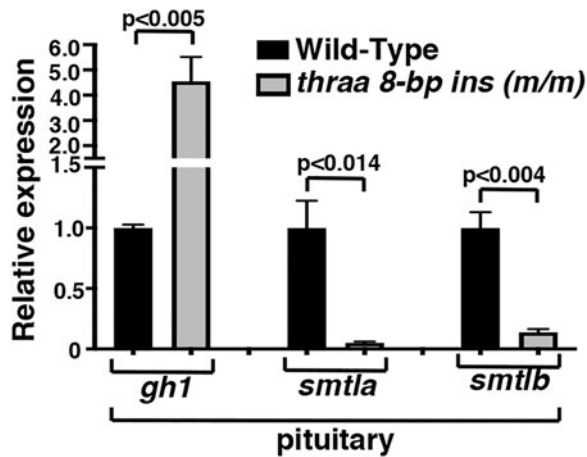

**SUPPLEMENTARY FIG. S6.** Altered expression of growth-related genes in adult homozygous *thraa 8-bp insertion (m/m)* mutant fish. The mRNA expression of *gh1*, *smtla*, and *smtlb* in pituitary of WT (black bars) and sibling homozygous *thraa 8-bp insertion (m/m)* mutant fish were determined by RT-qPCR as described in Supplementary Materials and Methods ( $N=10-24$  per sample). All expression levels are normalized to that of *efla* (*elongation factor 1-alpha*) in each well and expressed as the fold changes for each sample relative to WT. This experiment was repeated three times, each in triplicates. The data are expressed as mean  $\pm$  SE ( $p < 0.05$ ).

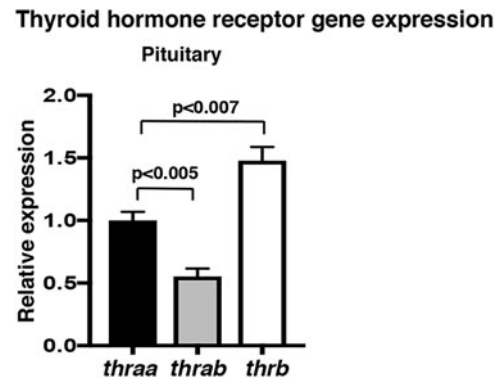

**SUPPLEMENTARY FIG. S8.** Thyroid hormone receptor gene expression in the pituitary of adult WT fish. The thyroid hormone receptor genes (*thraa*, *thrab*, and *thrb*) mRNA expression in pituitary of WT fish were determined by RT-qPCR as described in Supplementary Materials and Methods ( $N=10$  per sample). All expression levels are normalized to that of *efla* (*elongation factor 1-alpha*) in each well and expressed as the fold changes for each sample relative to WT. This experiment was repeated three times, each in triplicates. The data are expressed as mean  $\pm$  SE ( $p < 0.05$ ).

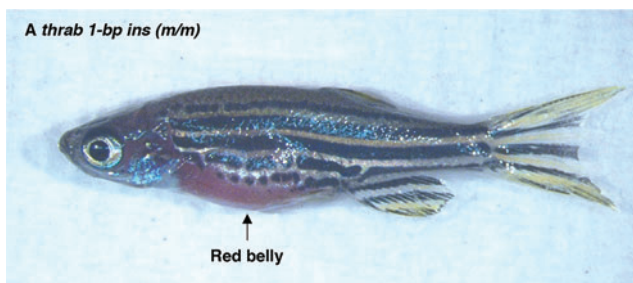

**SUPPLEMENTARY FIG. S7.** A representative example with enlarged image to show clearly “red belly” in a female adult *thrab 1-bp insertion (m/m)* mutant fish.

## A Sequence analysis of zebrafish thyroid hormone $\alpha$ receptors

```

Wild type-TR $\alpha$ L  MENTEQEHNLPEGDETOQWPNGVKRRKRNQSCSMNSTSDKSI SVPGYVPSYLEKDEPCVVC
Wild type-TR $\alpha$ S  MENTEQEHNLPEGDETOQWPNGVKRRKRNQSCSMNSTSDKSI SVPGYVPSYLEKDEPCVVC
8-bp insertion- TR $\alpha$ L  MENTEQEHNLPEGDETOQWPNGVKRRKRNQSCSMNSTSDKSI SVPGYVPSYLEKDEPCVVC
8-bp insertion- TR $\alpha$ S  MENTEQEHNLPEGDETOQWPNGVKRRKRNQSCSMNSTSDKSI SVPGYVPSYLEKDEPCVVC
*****

Wild type-TR $\alpha$ L  GDKATGYHYRCITCEGCKGFFRRTIQKNLHPSYSCKYDSCCI IDKITRNQCQLCRFRKCI
Wild type-TR $\alpha$ S  GDKATGYHYRCITCEGCKGFFRRTIQKNLHPSYSCKYDSCCI IDKITRNQCQLCRFRKCI
8-bp insertion- TR $\alpha$ L  GDKATGYHYRCITCEGCKGFFRRTIQKNLHPSYSCKYDSCCI IDKITRNQCQLCRFRKCI
8-bp insertion- TR $\alpha$ S  GDKATGYHYRCITCEGCKGFFRRTIQKNLHPSYSCKYDSCCI IDKITRNQCQLCRFRKCI
*****

Wild type-TR $\alpha$ L  SVGMAMDLVLDDSKRVAKRRLIEENREKRKKEEIVKTLHNRPEPTVSEWELIRMVTEAHR
Wild type-TR $\alpha$ S  SVGMAMDLVLDDSKRVAKRRLIEENREKRKKEEIVKTLHNRPEPTVSEWELIRMVTEAHR
8-bp insertion- TR $\alpha$ L  SVGMAMDLVLDDSKRVAKRRLIEENREKRKKEEIVKTLHNRPEPTVSEWELIRMVTEAHR
8-bp insertion- TR $\alpha$ S  SVGMAMDLVLDDSKRVAKRRLIEENREKRKKEEIVKTLHNRPEPTVSEWELIRMVTEAHR
*****

Wild type-TR $\alpha$ L  HTNAQGPHWKQRKFLPEDIGQSPAPTSNDNDKVDLEAFSEFTKIITPAITRVVDFAKKLP
Wild type-TR $\alpha$ S  HTNAQGPHWKQRKFLPEDIGQSPAPTSNDNDKVDLEAFSEFTKIITPAITRVVDFAKKLP
8-bp insertion- TR $\alpha$ L  HTNAQGPHWKQRKFLPEDIGQSPAPTSNDNDKVDLEAFSEFTKIITPAITRVVDFAKKLP
8-bp insertion-TR $\alpha$ S  HTNAQGPHWKQRKFLPEDIGQSPAPTSNDNDKVDLEAFSEFTKIITPAITRVVDFAKKLP
*****

Wild type-TR $\alpha$ L  MFSELPCEdQIILLKGCCMEIMSLRAAVRYDPESETLTLGEMAVSREQLKNGGLGVVSD
Wild type-TR $\alpha$ S  MFSELPCEdQIILLKGCCMEIMSLRAAVRYDPESETLTLGEMAVSREQLKNGGLGVVSD
8-bp insertion- TR $\alpha$ L  MFSELPCEdQIILLKGCCMEIMSLRAAVRYDPESETLTLGEMAVSREQLKNGGLGVVSD
8-bp insertion-TR $\alpha$ S  MFSELPCEdQIILLKGCCMEIMSLRAAVRYDPESETLTLGEMAVSREQLKNGGLGVVSD
*****

Wild type-TR $\alpha$ L  AIFDLGKLSQFNLDSEVALLQAVLLMSSDRSGLTCVEKIEKCQEMYLLAFEHYINHRK
Wild type-TR $\alpha$ S  AIFDLGKLSQFNLDSEVALLQAVLLMSSDRSGLTCVEKIEKCQEMYLLAFEHYINHRK
8-bp insertion- TR $\alpha$ L  AIFDLGKLSQFNLDSEVALLQAVLLMSSDRSGLTCVEKIEKCQEMYLLAFEHYINHRK
8-bp insertion-TR $\alpha$ S  AIFDLGKLSQFNLDSEVALLQAVLLMSSDRSGLTCVEKIEKCQEMYLLAFEHYINHRK
*****

Wild type-TR $\alpha$ L  HNISHFWPKLLMKVTNLRMIGACHASRFLHMKVECPTLFPPLFLEVFEDQEGSTGVA AQ
Wild type-TR $\alpha$ S  HNISHFWPKLLMKVTNLRMIGACHASRFLHMKVECPTLFPPLFLEVFEDQEV-----
8-bp insertion- TR $\alpha$ L  HNISHFWPKLLMKVTNLRMIGACHASRFLHMKVECPTLFPPLFEDQEV-----
8-bp insertion-TR $\alpha$ S  HNISHFWPKLLMKVTNLRMIGACHASRFLHMKVECPTLFPPLFEDQEV-----
*****

Wild type-TR $\alpha$ L  EDGSCLR 428
Wild type-TR $\alpha$ S  ----- 414
8-bp insertion- TR $\alpha$ L  ----- 410
8-bp insertion-TR $\alpha$ S  ----- 410

```

## B Amino acid sequence homology in the functional domains of zebrafish mutant receptors

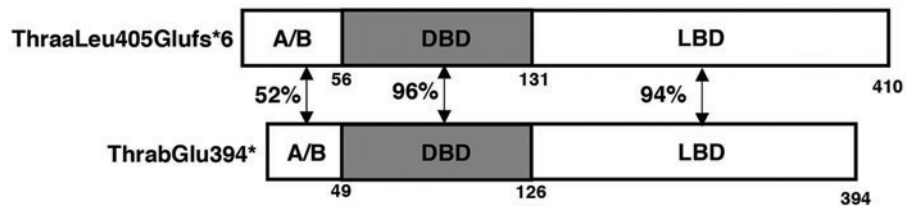

**SUPPLEMENTARY FIG. S9.** (A) Alignment of amino acid sequences among WT TR $\alpha$ 1L and TR $\alpha$ 1S with the corresponding ThraaLeu405Glufs\*6 mutant due to an 8-bp insertion mutation in the *thraa* gene. (B) Comparison of the extent of amino acid sequence homology in the functional DBD and LBD between ThraaLeu405Glufs\*6 mutant and ThrabGlu394\* mutant. DBD, DNA-binding domain; LBD, ligand-binding domain.

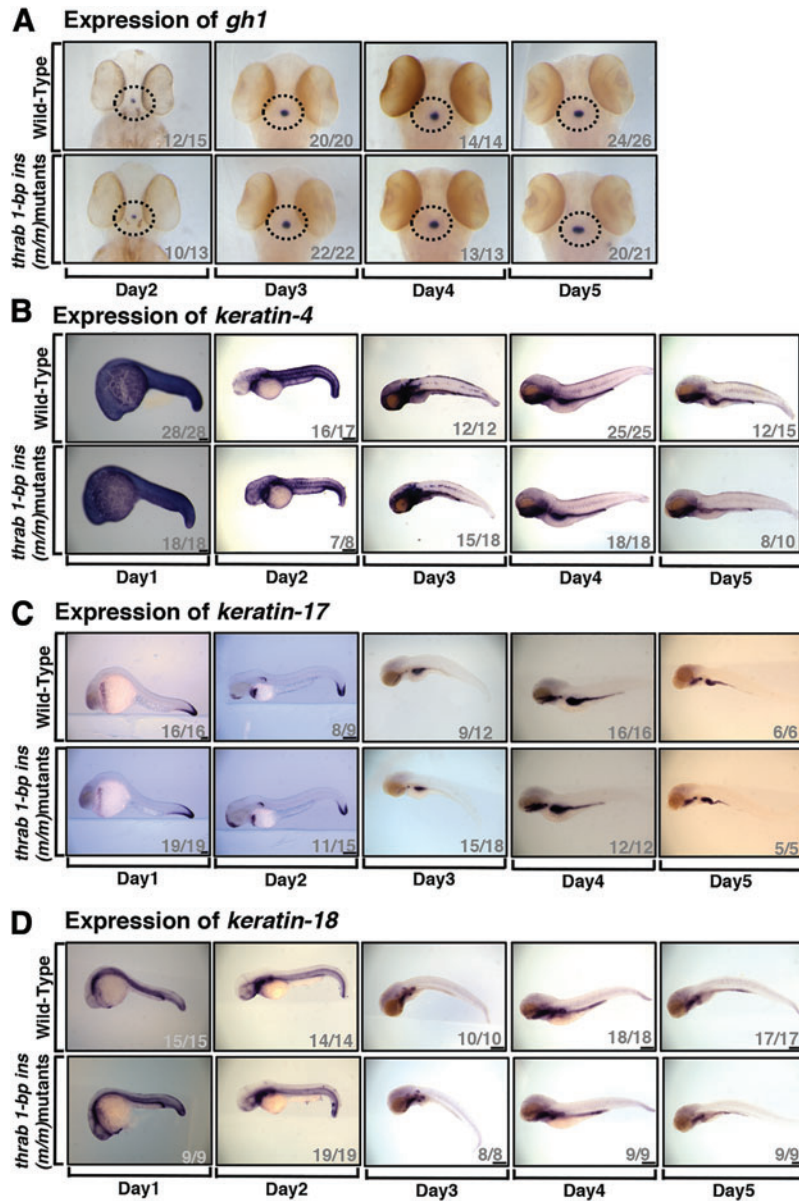

**SUPPLEMENTARY FIG. S10.** The expression of the growth hormone and keratin genes was not affected by the expression of the *thrab 1-bp insertion (m/m)* mutant during embryogenesis. (A) WISH staining of zebrafish *gh1* expression from 48 to 120 hpf in *thrab 1-bp insertion (m/m)* mutant embryos/larvae and their WT siblings. The *gh1* expression was visualized in the pituitary (indicated with a dotted circle). No apparent differences in the *gh1* expression were detected between WT and mutant embryos/larvae. (B) The images of WISH staining of zebrafish *keratin-4* expression. The *keratin-4* is expressed in all cells of the embryos from 24 to 120 hpf. At 24 hpf, the *keratin-4* is expressed in epidermal superficial stratum and epidermis; at 48 hpf, it expressed in the epidermal superficial stratum, epidermis, and pharynx; at 72 hpf, the *keratin-4* is expressed in epidermis and pharynx and also intensively expressed in endocrine system; at 96–120 hpf, it was expressed in epidermis, endocrine system, and in pharynx/pharyngeal arch 3–7 skeleton. (C) The *keratin-17* expression was visualized from 24 to 120 hpf. At 24 hpf, the *keratin-17* expression was visualized in head epidermis, hatching gland, and caudal fin epidermis. At 48 hpf, it was expressed in pectoral fin epidermis, nose epidermis, dorsal epidermis, and caudal fin epidermis. At 96 to 120 hpf, the *keratin-17* was intensively expressed in epidermis, endocrine system, and pharynx/pharyngeal arch 3–7 skeleton. (D) The *keratin-18* expression at from day 1 embryos to day 5 larvae in *thrab 1-bp insertion (m/m)* mutant larvae and their WT siblings. At 24 hpf, the *keratin-18* was expressed in epidermis, notochord, fin fold, pronephric duct, and axial vasculature. At 48 hpf, it was expressed in nose, branchial arches, pectoral fin bud, metencephalic middle cerebral vein, and pronephric duct. At 72–120 hpf, the *keratin-18* expression was intensively visualized in epithelial cells, pronephric duct, digestive tract, dorsal aorta, and fins. Note that *keratin-4*, *keratin-17*, and *keratin-18* expressions are not changeable in *thrab 1-bp insertion (m/m)* mutant embryos to larvae as compared with their WT siblings from 24 to 120 hpf. The numerators of the fraction in the right corners of each panel represent the embryos/larvae showing identical patterns of staining. The denominators indicate the total number of embryos/larvae analyzed. hpf, hours postfertilization; WISH, whole mount *in situ* hybridization.

SUPPLEMENTARY TABLE S1. ALTERED GENE  
EXPRESSION OF HORMONES AND REGULATORS  
IN THE PITUITARY OF ADULT HOMOZYGOUS *THRAB 1-BP*  
INSERTION MUTANT FISH COMPARED  
WITH WILD-TYPE FISH

| <i>Gene</i>  | <i>Fold change</i> | <i>FDR</i> |
|--------------|--------------------|------------|
| <i>smtlb</i> | 0.56               | 0.00611    |
| <i>tshba</i> | 5.76               | 0.00001    |
| <i>trhrb</i> | 4.23               | 0.00967    |
| <i>gh1</i>   | 0.43               | 0.04472    |
| <i>pomca</i> | 0.71               | 0.00005    |
| <i>lhb</i>   | 0.77               | 0.00632    |

FDR, false discovery rate.

SUPPLEMENTARY TABLE S2. REAL-TIME QUANTITATIVE PCR PRIMERS USED

| <i>Target</i>                                            | <i>Forward primer (5'-</i> | <i>Reverse primer (5'-</i> |
|----------------------------------------------------------|----------------------------|----------------------------|
| <i>Growth hormone (gh1)</i>                              | CCTCTGTCGTTCTGCAACTC       | ACTCCCAGGATTCAATGAGG       |
| <i>Somatolactin a (smtla)</i>                            | TGGTTCAGTCGTGGATGG         | AAGATGGTGGAGGATGCC         |
| <i>Somatolactin b (smtlb)</i>                            | TCTCGGAGGAAGCCAAGTTG       | AGCCATCGGTCGGAAATCTG       |
| <i>Insulin-like growth factor 1a (igf-1a)</i>            | GGTGCTGTGCGTCCTC           | GTCCATATCCTGTGCGTTTG       |
| <i>Insulin-like growth factor 1b (igf-1b)</i>            | GGTGGTCCTCGCTCTC           | TCTGCTAACTTCTGGTATCG       |
| <i>Insulin-like growth factor 1 receptor a (igf-1ra)</i> | TCAAGCACACTCATACTCTGGGC    | TTTCCGTTGGGAGCGATAGG       |
| <i>Insulin-like growth factor 1 receptor b (igf-1rb)</i> | TGAACCAGATAAACCCAACGG      | CATACACCATAACAAACGACCCC    |
| <i>Insulin receptor a (Ir-a)</i>                         | AAGACATAGTGAAAGGAGAGT      | TACGGTCAGGTCTTCGGC         |
| <i>Glucose transporter (glut4)</i>                       | GTATGATCTCCTCCTTCTGTGTGG   | CGATGCCAAACAGTATGCAC       |
| <i>Myostatin (myo)</i>                                   | ACTCAAGCAGGCTCCAAACAT      | GTGCTCCTCCTCCGCCGGTCT      |
| <i>Keratin 4 (krt4)</i>                                  | CTGTAACGTCAACCAGA ACC      | CATCTGTTCTGCTGTTC A        |
| <i>Keratin 5 (krt5)</i>                                  | TGCTTCCTTCATTGACAA         | GGTAGTGGTCTGTTCTTG         |
| <i>Keratin 15 (krt15)</i>                                | TGGGGTCCGTATCTCCTCTG       | CAGGTCTTGATTGTGGCCT        |
| <i>Keratin 17 (krt17)</i>                                | GGAGTGCGTGCTGGTAGTGTCT     | GGTAGGAGGCCAGACGATCATT     |
| <i>Keratin 18 (krt18)</i>                                | TGACACCAACCTGAACCCGAT      | AGGAGCATCAACATCCACCTGC     |
| <i>Collagen, type1, alpha 1b (coll1a1b)</i>              | GCTGGTGCTACTGGACCTAAA      | GGGCTCCTCTTTGTCCCTCT       |
| <i>Type 1 cytokeratin (cyt1)</i>                         | TGGACAAGTCAATGTAGAG        | TCATAGTGTTCACGGATA         |
| <i>Type 1 cytokeratin (cki)</i>                          | AGACTGGAGATGGAGATT         | TACTACTTTGCGTGTGTG         |
| <i>Thyroid stimulating hormone b (tshb)</i>              | CTGTCAACACCACCATCTGC       | GTGCATCCCCTCTGAACAAT       |
| <i>Thyrotropin-releasing hormone receptor b (trhrb)</i>  | CTGGTGGTGGTCAACTCCTT       | GCTTCCACCGTTGATGTTT        |
| <i>Proopiomelanocortin a (pomca)</i>                     | AGCTCAGTGTTGGGAAAACG       | GGTAGACGGGGGTTTCATCT       |
| <i>Luteinizing hormone, beta (lhb)</i>                   | CGCTATGAGACCAATTAAC        | GTAGGTTGATGTGAGTTG         |
| <i>Thyroid hormone receptor alpha (thraa)</i>            | CTGATGCCATCTTTGATTTGGG     | GTACATCTCCTGACACTTCTCG     |
| <i>Thyroid hormone receptor alpha (thrab)</i>            | TCTGATGCCATCTTCGACTTG      | GTACATCTCCTGACACTTCTC      |
| <i>Thyroid hormone receptor beta (thrb)</i>              | GCTCTGGCTCTTATGACATGG      | TCGCTGATATCTCGTGCTTTG      |
| <i>Elongation factor 1 a (ef1a)</i>                      | GCCGTCCCACCGACAAG          | CCACACGACCCACAGGTACAG      |



SUPPLEMENTARY TABLE S3. SOURCES OF ANTIBODIES

| No. | Name              | Cat. No.   | Company        | Reactivity                            | Reference 1                | Reference 2               |
|-----|-------------------|------------|----------------|---------------------------------------|----------------------------|---------------------------|
| 1   | p-AKT (Ser473)    | 4060       | Cell Signaling | H, M, R, Mk, Hm, B, Dm, zebrafish     |                            |                           |
| 2   | Total-AKT         | 9272       | Cell Signaling | H, M, R, Mk, Pg, C, Hm, B, GP, Dm, Dg | Souza <i>et al.</i> (S5)   | Ciarlo <i>et al.</i> (S6) |
| 3   | p-p70S6 (Thr389)  | 9205       | Cell Signaling | H, M, R, Mk                           | Khora <i>et al.</i> (S7)   | Sasore <i>et al.</i> (S8) |
| 4   | Total-p70S6       | 9202       | Cell Signaling | H, M, R, Mk                           | Wen and Ushio (S9)         |                           |
| 5   | p-S6 (Ser240/244) | 2215       | Cell Signaling | H, M, R, Mk, zebrafish                |                            |                           |
| 6   | Total S6          | 2217       | Cell Signaling | H, M, R, Mk                           | Khora <i>et al.</i> (S7)   | Ding <i>et al.</i> (S10)  |
| 7   | GAPDH             | 2118       | Cell Signaling | H, M, R, Mk, B                        | Ciarlo <i>et al.</i> (S6)  |                           |
| 8   | Keratin-5         | MS-1814-S0 | NeoMarkers     | H                                     | Saxena <i>et al.</i> (S11) |                           |
| 9   | Keratin-17        | MS-489-S0  | NeoMarkers     | H, R                                  | Saxena <i>et al.</i> (S11) |                           |
| 10  | Keratin-18        | MS-743-S0  | NeoMarkers     | H                                     |                            |                           |
| 11  | p-STAT3 (Tyr705)  | 9131       | Cell Signaling | H, M, R, Mk                           | Fang <i>et al.</i> (S12)   | Ogai <i>et al.</i> (S13)  |
| 12  | Total-STAT3       | 4904       | Cell Signaling | H, M, R, Mk                           | Fang <i>et al.</i> (S12)   | Ogai <i>et al.</i> (S13)  |
| 13  | Cyclin D1         | 9041-P1    | NeoMarkers     | H, R, M                               | Duffy <i>et al.</i> (S14)  |                           |
| 14  | CDK6              | SC-7961    | SantaCruz      | H, R, M                               |                            |                           |
| 15  | p-Rb (Ser780)     | 9307       | Cell Signaling | H, R, Mk                              |                            |                           |
| 16  | Total-Rb          | SC-50      | SantaCruz      | H, R, M                               | Zhang <i>et al.</i> (S15)  |                           |

Species cross-reactivity key: B, bovine; C, chicken; Dg, dog; Dm, *Drosophila melanogaster*; GP, guinea pig; H, human; Hm, hamster; M, mouse; Mk, monkey; Pg, pig; R, rat; Z, zebrafish.

### Supplementary References

- S1. Park JW, Zhao L, Webb P, Cheng SY 2014 Src-dependent phosphorylation at Y406 on the thyroid hormone receptor beta confers the tumor suppressor activity. *Oncotarget* **5**:10002–10016.
- S2. Fozzatti L, Lu C, Kim DW, Park JW, Astapova I, Gavrillova O, Willingham MC, Hollenberg AN, Cheng SY 2011 Resistance to thyroid hormone is modulated in vivo by the nuclear receptor corepressor (NCOR1). *Proc Natl Acad Sci U S A* **108**:17462–17467.
- S3. Lin HM, Kaneshige M, Zhao L, Zhang X, Hanover JA, Cheng SY 2001 An isoform of branched-chain aminotransferase is a novel co-repressor for thyroid hormone nuclear receptors. *J Biol Chem* **276**:48196–48205.
- S4. Thisse C, Thisse B 2008 High-resolution in situ hybridization to whole-mount zebrafish embryos. *Nat Protoc* **3**:59–69.
- S5. Souza BR, Romano-Silva MA, Tropepe V 2011 Dopamine D2 receptor activity modulates Akt signaling and alters GABAergic neuron development and motor behavior in zebrafish larvae. *J Neurosci* **31**:5512–5525.
- S6. Ciarlo C, Kaufman CK, Kinikoglu B, Michael J, Yang S, D'Amato C, Blokzijl-Franke S, den Hertog J, Schlaeger TM, Zhou Y, Liao E, Zon LI 2017 A chemical screen in zebrafish embryonic cells establishes that Akt activation is required for neural crest development. *eLIFE* **6**:pii: e29145.
- S7. Khora ES, Noorb SM, Wong PF 2016 Expression of zTOR-associated microRNAs in zebrafish embryo treated with rapamycin. *Life Sci* **150**:67–75.
- S8. Sasore T, Kennedy B 2014 Deciphering combinations of PI3K/AKT/mTOR pathway drugs augmenting anti-angiogenic efficacy *in vivo*. *PLoS One* **9**:e105280.
- S9. Wen Y, Ushio H 2017 Ferulic acid promotes hypertrophic growth of fast skeletal muscle in zebrafish model. *Nutrients* **9**:pii: E1066.
- S10. Ding Y, Dvornikov AV, Ma X, Zhang H, Wang Y, Lowerison M, Packard RR, Wang L, Chen J, Zhang Y, Hsiai T, Linand X, Xu X 2019 Haploinsufficiency of mechanistic target of rapamycin ameliorates *bag3* cardiomyopathy in adult zebrafish. *Dis Model Mech* **12**:pii: dmm040154.
- S11. Saxena S, Singh SK, Meena Lakshmi MG, Meghah V, Bhatti B, Brahmendra Swamy CV, Sundaram CS, Idris MM 2012 Proteomic analysis of zebrafish caudal fin regeneration. *Mol Cell Proteomics* **11**:M111.014118.
- S12. Fang Y, Gupta V, Karra R, Holdway JE, Kikuchi K, Poss KD 2013 Translational profiling of cardiomyocytes identifies an early Jak1/Stat3 injury response required for zebrafish heart regeneration. *Proc Natl Acad Sci U S A* **110**:13416–13421.
- S13. Ogai K, Kuwana A, Hisano S, Nagashima M, Koriyama Y, Sugitani K, Mawatari K, Nakashima H, Kato S 2014 Upregulation of leukemia inhibitory factor (LIF) during the early stage of optic nerve regeneration in zebrafish. *PLoS One* **9**:e106010.
- S14. Duffy KT, McAleer MF, Davidson WR, Kari L, Kari C, Liu CG, Farber SA, Cheng KC, Mest JR, Wickstrom E, Dicker AP, Rodeck U 2005 Coordinate control of cell cycle regulatory genes in zebrafish development tested by cyclin D1 knockdown with morpholino phosphorodiamidates and hydroxypropyl-phosphono peptide nucleic acids. *Nucleic Acids Res* **33**:4914–4921.
- S15. Zhang Z, Liu W, Zhao L, Huang Z, Chen X, Ma N, Xu J, Zhang W, Zhang Y 2018 Retinoblastoma 1 protects T cell maturation from premature apoptosis by inhibiting E2F1. *Development* **145**:pii: dev158139.
